# Supplementary material for: Antioxidant Activities of an Exopolysaccharide (DeinoPol) Produced by the Extreme Radiation-Resistant Bacterium Deinococcus radiodurans
Source: PubMed Central journal article supplement (PMC6952347; doi:10.1038/s41598-019-56141-3), 2020-01-09
Supplement: 41598_2019_56141_MOESM1_ESM.pdf [file 41598_2019_56141_MOESM1_ESM.pdf]

# Antioxidant Activities of an Exopolysaccharide (DeinoPol) Produced by the Extreme Radiation-Resistant Bacterium *Deinococcus radiodurans*

Shun Mei Lin,<sup>1,2\*</sup> Chan Yu Baek,<sup>1,3\*</sup> Jong-Hyun Jung,<sup>1,4</sup> Woo Sik Kim,<sup>1</sup> Ha-Yeon Song,<sup>1</sup> Ji Hee Lee,<sup>1</sup> Hyun Jung Ji,<sup>1</sup> Yong Zhi,<sup>1,4</sup> Bo Sun Kang,<sup>5</sup> Yong-Sun Bahn,<sup>3</sup> Ho Seong Seo,<sup>1,4#</sup> and Sangyong Lim<sup>1,4#</sup>

<sup>1</sup>Research Division for Radiation Science, Korea Atomic Energy Research Institute, Jeongeup, Republic of Korea

<sup>2</sup>R&D Center, MediNResearch, Jeongeup, Republic of Korea

<sup>3</sup>Department of Biotechnology, College of Life Science and Biotechnology, Yonsei University, Seoul, Republic of Korea

<sup>4</sup>Department of Radiation Biotechnology and Applied Radioisotope Science, University of Science and Technology, Daejeon, Republic of Korea

<sup>5</sup>Department of Radiological Science, Konyang University, Daejeon, Republic of Korea

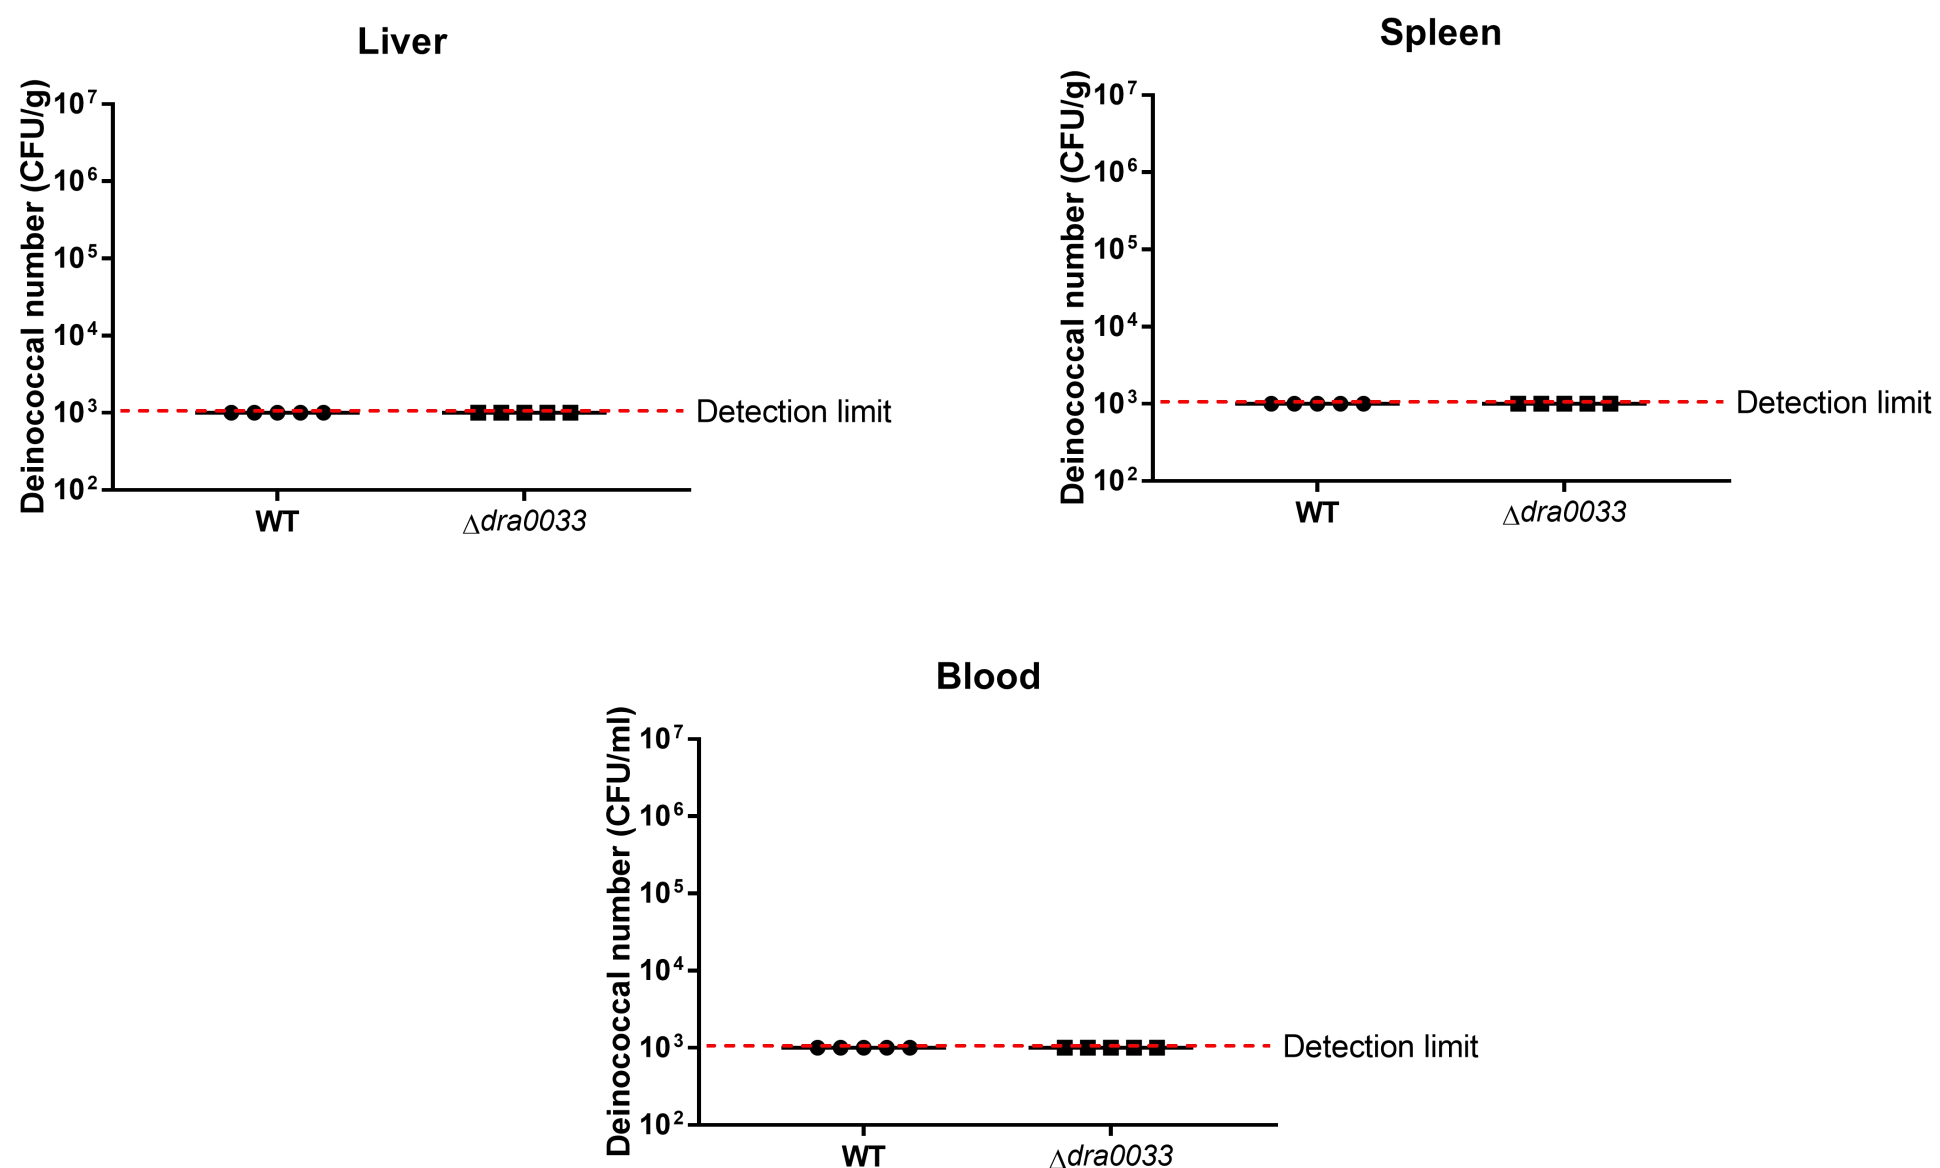

**Supplementary Figure 01. Clearance of *D. radiodurans* in mice.** (A-C) Mice (n=5 per group) were inoculated intraperitoneally (i.p.) with either wild-type R1 (WT) or  $\Delta dra0033$  ( $10^8$  CFU). Blood, liver, and spleen of mice were collected at 72 h after inoculation and plated onto TGY agar plates to measure the survival of *D. radiodurans* in mice. Detection limit indicates the minimum number of enumerated bacteria on a TGY agar plate ( $10^3$  CFU).

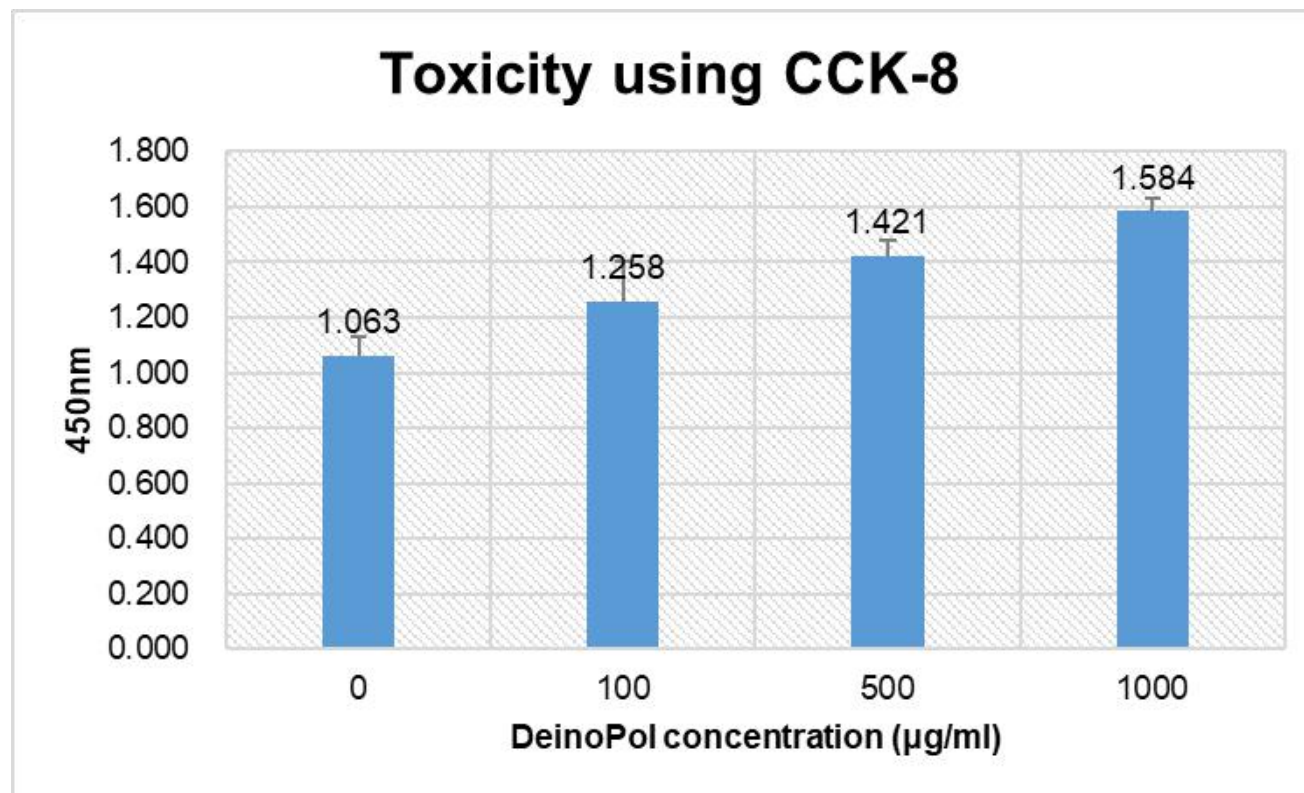

**Supplementary Figure 02. Toxicity of DeinoPol.** An approximately 70% confluent NHEK-Ad monolayer was incubated with the indicated concentration of DeinoPol for 24 h. Cell proliferation was measured by adding 5 µL CCK-8 and incubating for an additional 2 h at 37 °C. Viable cell number was estimated by measuring the optical density at 450 nm.

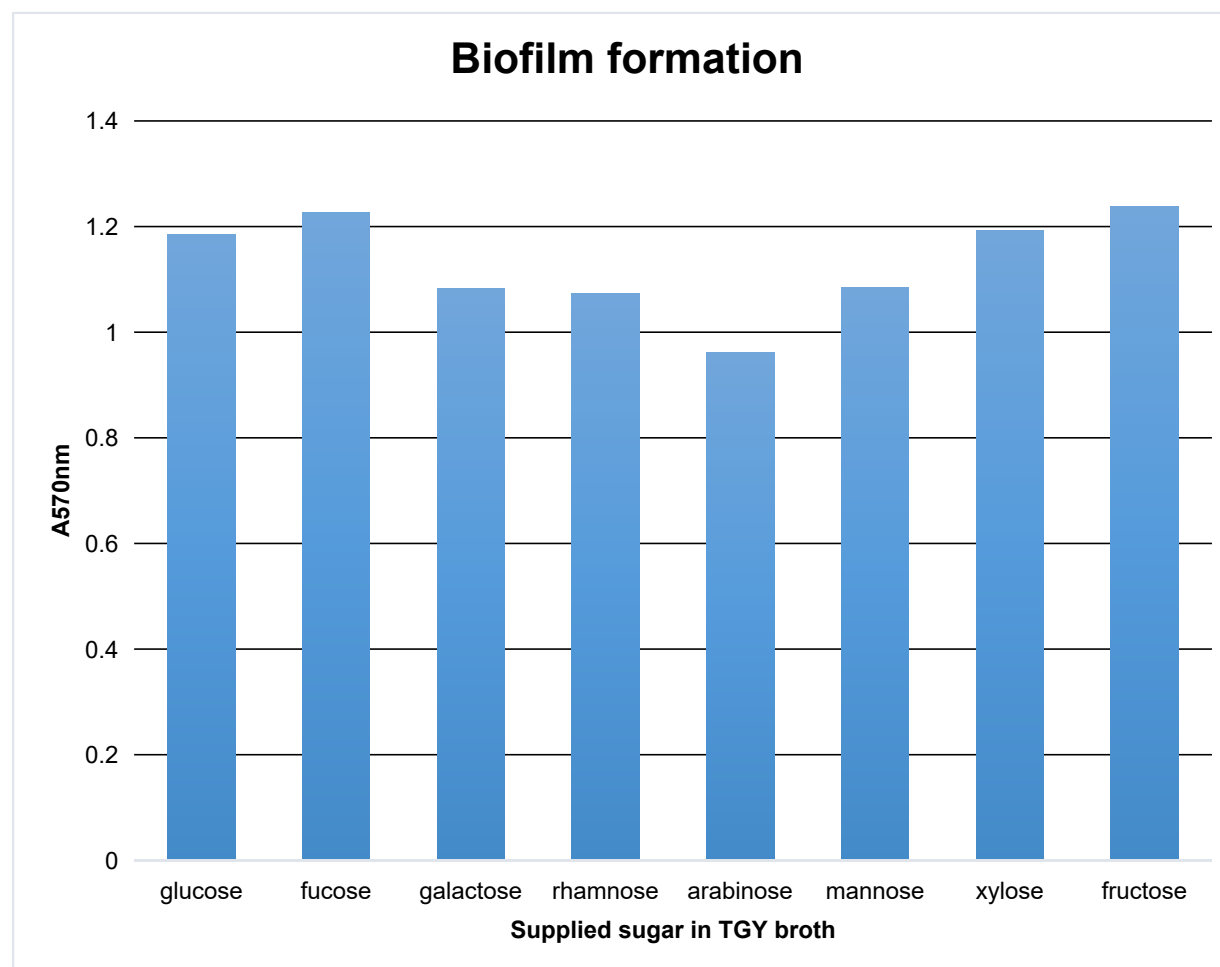

**Supplementary Figure 03. Deinococcal biofilm formation in TGY broth with different sugar sources.** *D. radiodurans* were seeded on a 96-well plate and incubated for 48 h at 30 °C. Levels of biofilm formation were measured by staining with 1% crystal violet, and absorbance was read at 450nm.
